# Supplementary material
Source: PubMed Central journal article supplement (PMC9217939)
Supplement: 41598_2022_14664_MOESM1_ESM.pdf [file 41598_2022_14664_MOESM1_ESM.pdf]

# SUPPORTING INFORMATION

## Quercetin and Luteolin are single-digit micromolar inhibitors of the SARS- CoV-2 RNA-dependent RNA polymerase

Federico Munafò,<sup>1,#</sup> Elisa Donati,<sup>1,#</sup> Nicoletta Brindani,<sup>1</sup> Giuliana Ottonello,<sup>2</sup>

Andrea Armirotti<sup>2</sup>, Marco De Vivo<sup>1,\*</sup>

1. Molecular Modeling and Drug Discovery Lab, Istituto Italiano di Tecnologia, via Morego 30, 16163 Genova, Italy
2. Analytical Chemistry Facility, Istituto Italiano di Tecnologia, via Morego, 30, 16163 Genoa, Italy

Corresponding authors:

Marco De Vivo E-mail: marco.devivo@iit.it

#Equally contributed.

### Table of contents

- Chromatography analysis of luteolin and quercetin S2
- Computational results – detail S4

# 1. Chromatography analysis of luteolin and quercetin

The chromatographic analyses were run on an ACQUITY UPLC BEH C18 (50x2.1mmID, particle size 1.7µm) with a VanGuard BEH C18 pre-column (5x2.1mmID, particle size 1.7µm) (LogD>1). The mobile phase was 10mM NH<sub>4</sub>OAc in H<sub>2</sub>O at pH 5 adjusted with AcOH (A) and 10mM NH<sub>4</sub>OAc in CH<sub>3</sub>CN-H<sub>2</sub>O (95:5) at pH 5 (B). The mobile-phase B proportion increased from 10 % to 90 % in 7 min.

## Luteolin

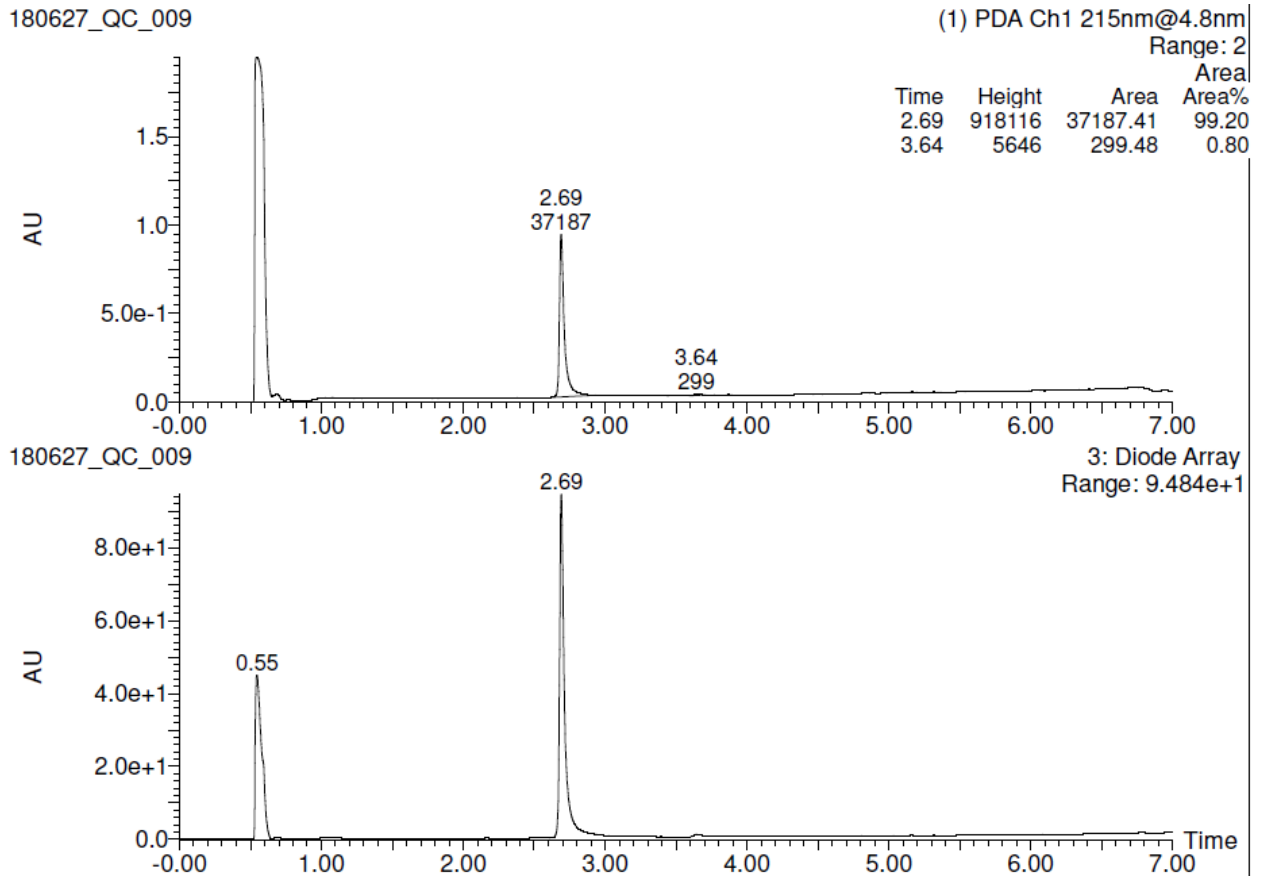

Quercetin

201012\_QC\_011

(1) PDA Ch1 215nm@4.8nm

Range: 2

| Time | Height | Area    | Area%  |
|------|--------|---------|--------|
| 2.68 | 97553  | 5549.20 | 100.00 |

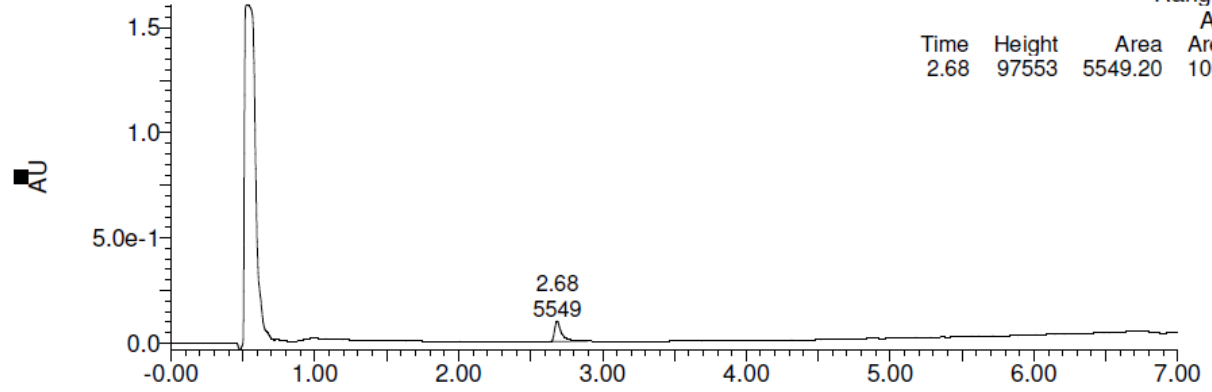

201012\_QC\_011

3: Diode Array

Range: 3.787e+1

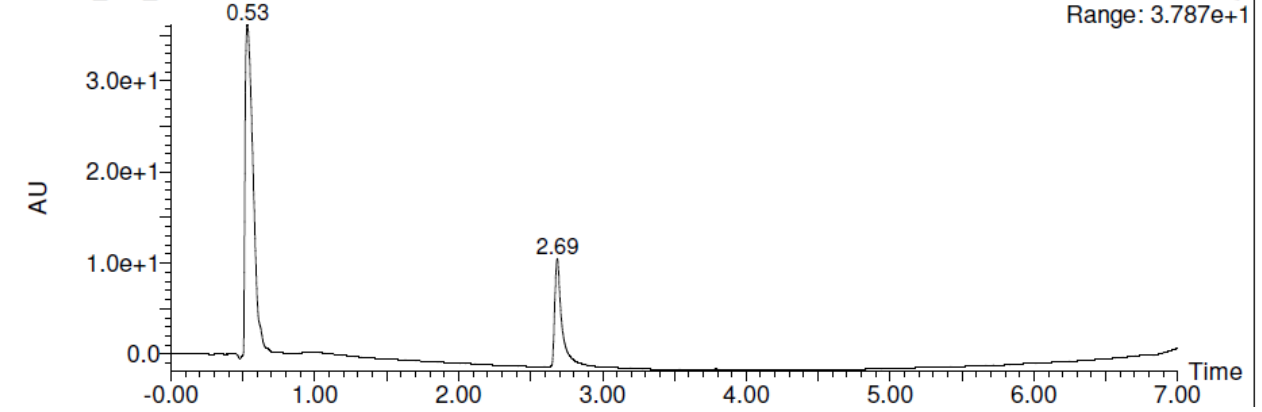

## 2. Computational studies - Detail

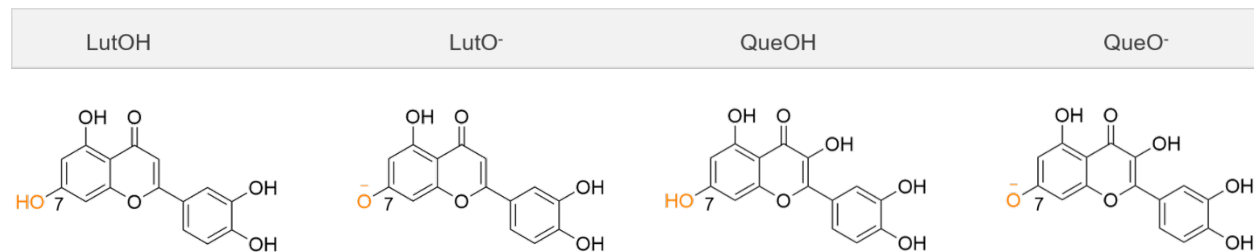

**Figure S1.** Chemical structures of luteolin and quercetin in different protonation states.

**Table S1.** Docking scores of both ligands in each protonation state, obtained from XP Glide for both binding pockets (i.e. B<sub>RNA</sub> and B<sub>NTP</sub>).

| <b>B<sub>RNA</sub> binding pocket</b> |               | <b>B<sub>NTP</sub> binding pocket</b> |               |
|---------------------------------------|---------------|---------------------------------------|---------------|
| <b>Name</b>                           | <b>GScore</b> | <b>Name</b>                           | <b>GScore</b> |
| <b>*QueO<sup>-</sup></b>              | <b>-7,689</b> | <b>*QueO<sup>-</sup></b>              | <b>-7,62</b>  |
| QueO <sup>-</sup>                     | -7,656        | QueOH                                 | -5,443        |
| QueO <sup>-</sup>                     | -7,541        | <b>*LutOH</b>                         | <b>-5,228</b> |
| QueO <sup>-</sup>                     | -7,25         | LutOH                                 | -5,172        |
| QueO <sup>-</sup>                     | -7,191        | LutOH                                 | -4,746        |
| QueO <sup>-</sup>                     | -7,168        | QueOH                                 | -4,534        |
| QueO <sup>-</sup>                     | -6,554        | QueO <sup>-</sup>                     | -4,309        |
| <b>*LutO<sup>-</sup></b>              | <b>-6,175</b> | QueO <sup>-</sup>                     | -4,199        |
| LutO <sup>-</sup>                     | -6,122        | QueOH                                 | -4,178        |
| LutO <sup>-</sup>                     | -6,081        | QueOH                                 | -4,098        |
| QueOH                                 | -5,977        | QueOH                                 | -4,076        |
| QueOH                                 | -5,939        | QueO <sup>-</sup>                     | -4,054        |
| QueOH                                 | -5,935        | QueO <sup>-</sup>                     | -3,807        |
| QueOH                                 | -5,927        | LutO <sup>-</sup>                     | -3,464        |
| QueOH                                 | -5,923        | QueO <sup>-</sup>                     | -3,354        |
| LutO <sup>-</sup>                     | -5,869        | QueOH                                 | -3,351        |
| QueOH                                 | -5,801        | QueO <sup>-</sup>                     | -3,209        |
| QueOH                                 | -5,722        | LutOH                                 | -3,181        |
| QueOH                                 | -5,48         | LutOH                                 | -3,077        |
| QueOH                                 | -5,446        | LutOH                                 | -3,074        |
| QueOH                                 | -5,439        | LutO <sup>-</sup>                     | -3,039        |
| LutO <sup>-</sup>                     | -5,21         | LutOH                                 | -2,902        |
| LutO <sup>-</sup>                     | -5,187        | LutOH                                 | -2,889        |
| LutO <sup>-</sup>                     | -5,161        | LutOH                                 | -2,864        |
| LutO <sup>-</sup>                     | -5,111        |                                       |               |
| LutO <sup>-</sup>                     | -5,028        |                                       |               |
| LutO <sup>-</sup>                     | -4,99         |                                       |               |
| LutO <sup>-</sup>                     | -4,899        |                                       |               |
| LutO <sup>-</sup>                     | -4,88         |                                       |               |
| LutO <sup>-</sup>                     | -4,603        |                                       |               |
| LutO <sup>-</sup>                     | -4,34         |                                       |               |
| LutO <sup>-</sup>                     | -4,148        |                                       |               |
| QueO <sup>-</sup>                     | -3,95         |                                       |               |
| QueO <sup>-</sup>                     | -3,828        |                                       |               |
| LutOH                                 | -3,501        |                                       |               |
| LutOH                                 | -3,009        |                                       |               |
| LutOH                                 | -2,945        |                                       |               |
| LutOH                                 | -2,89         |                                       |               |
| LutO <sup>-</sup>                     | -2,469        |                                       |               |

\*in red selected poses for subsequent MD simulations

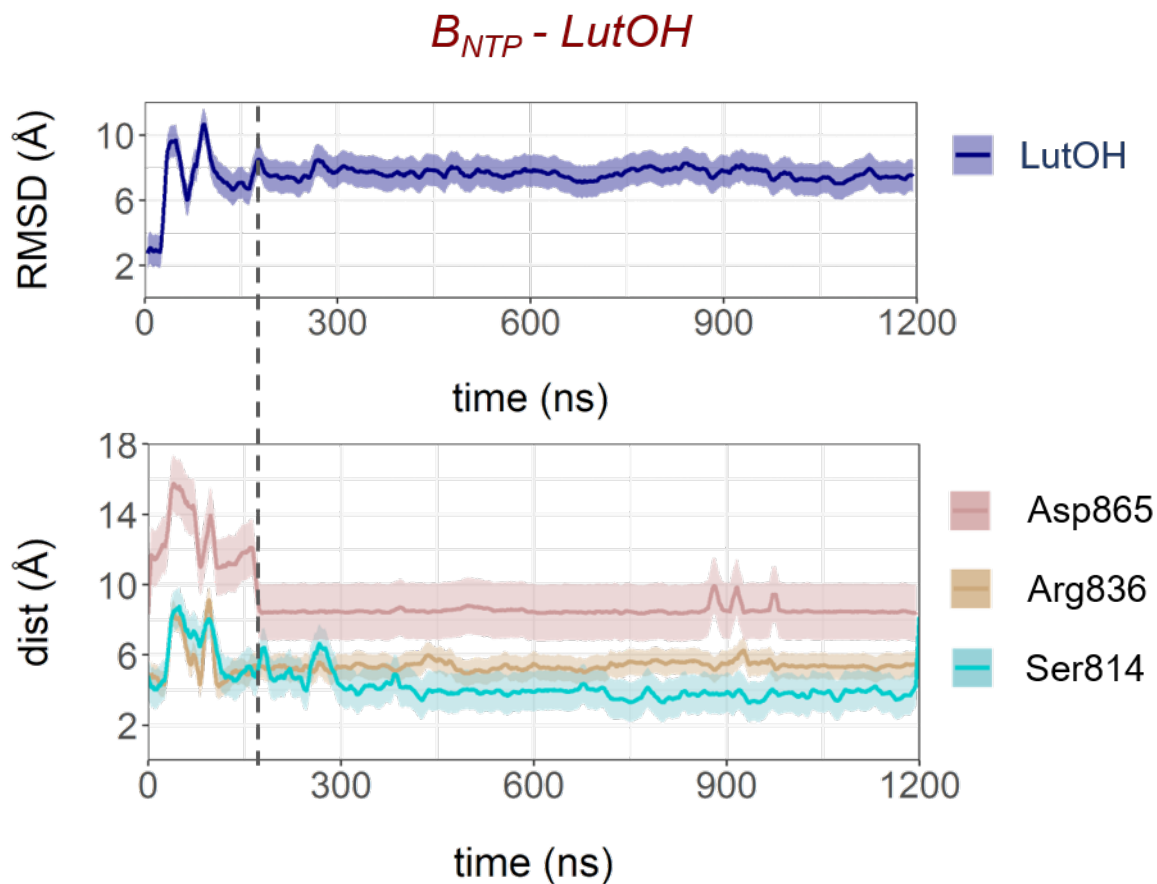

**Figure S2.** MD simulation of the  $B_{NTP}$ -LutOH system. (Top) Time evolution of the root mean square deviation (RMSD) for the heavy atoms of LutOH. (Bottom) Time evolution of the distances between the center of mass (C.O.M.) of the heavy atoms of the LutOH ligand and i) the C.O.M. of the heavy atoms of the guanidinium group of Arg836 (in light brown), ii) the C.O.M. of the heavy atoms of the carboxyl group of Asp865 (in pink), and iii) the C.O.M. of the heavy atoms of the side chain of Ser814 (in cyan). The dashed line marks the reorganization of LutOH.

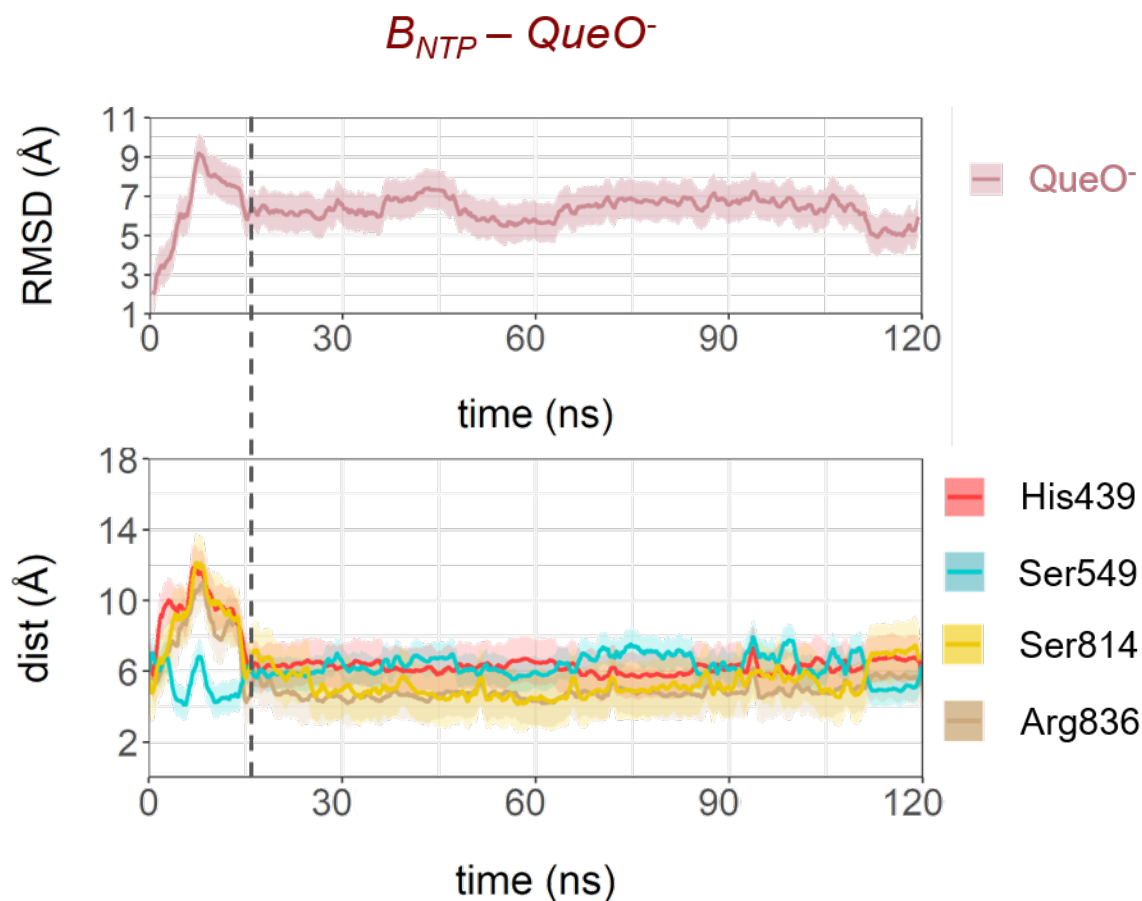

**Figure S3.** MD simulation of the  $B_{NTP}$ -QueO<sup>-</sup> system. (Top) Time evolution of the root mean square deviation (RMSD) for the heavy atoms of QueO<sup>-</sup>. (Bottom) Time evolution of the distances between the center of mass (C.O.M.) of the heavy atoms of the QueO<sup>-</sup> ligand and i) the C.O.M. of the heavy atoms of the guanidinium group of Arg836 (in light brown), ii) the C.O.M. of the heavy atoms of the side chain of Ser549 (in pink), iii) the C.O.M. of the heavy atoms of the side chain of Ser814 (in cyan). The dashed line marks the reorganization of LutOH, and iv) the C.O.M. of the heavy atoms of imidazole group of His439. The dashed line marks the reorganization of LutOH.

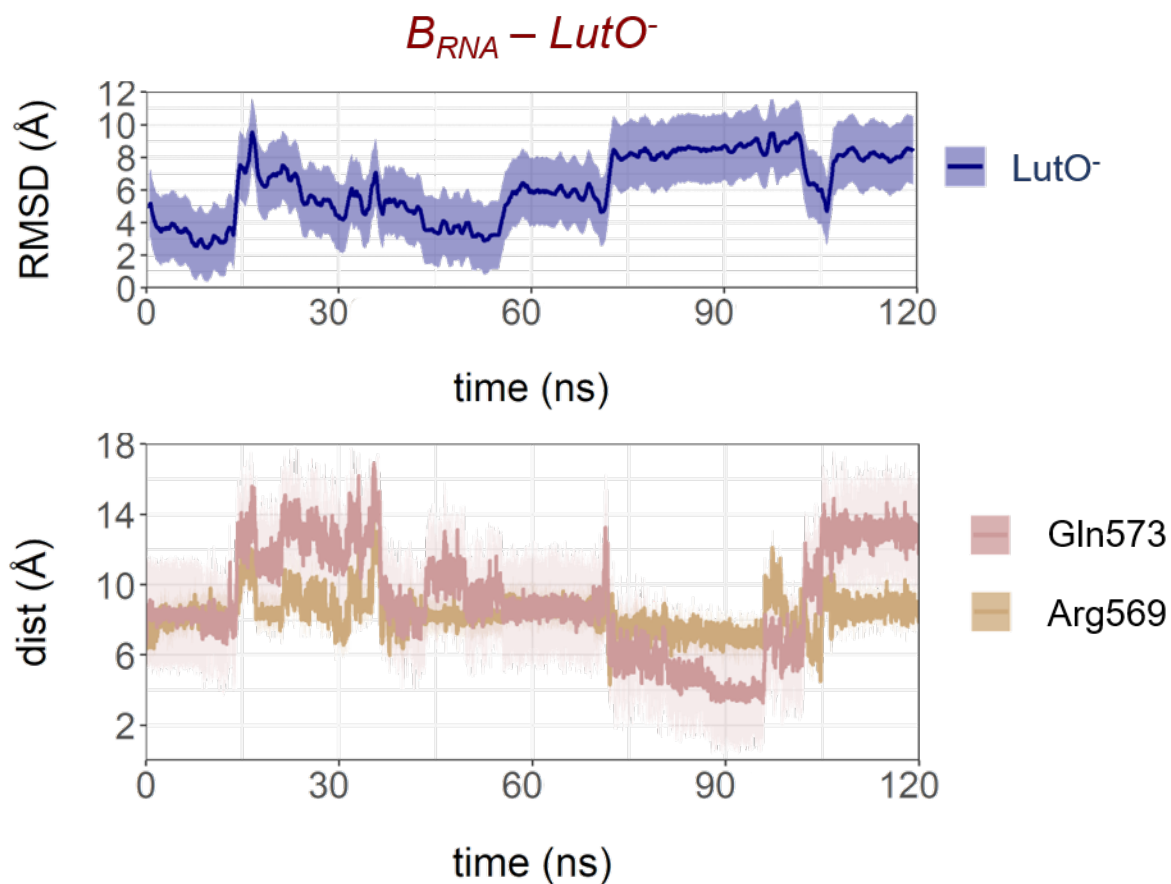

**Figure S4.** MD simulation of the  $B_{RNA}$ - $LutO^-$  system. (Top) Time evolution of the root mean square deviation (RMSD) for the heavy atoms of  $LutO^-$ . (Bottom) Time evolution of the distances between the center of mass (C.O.M.) of the heavy atoms of the  $LutO^-$  ligand and i) the C.O.M. of the heavy atoms of the guanidinium group of Arg569 (in light brown), ii) the C.O.M. of the heavy atoms of the side chain of Gln573 (in pink).



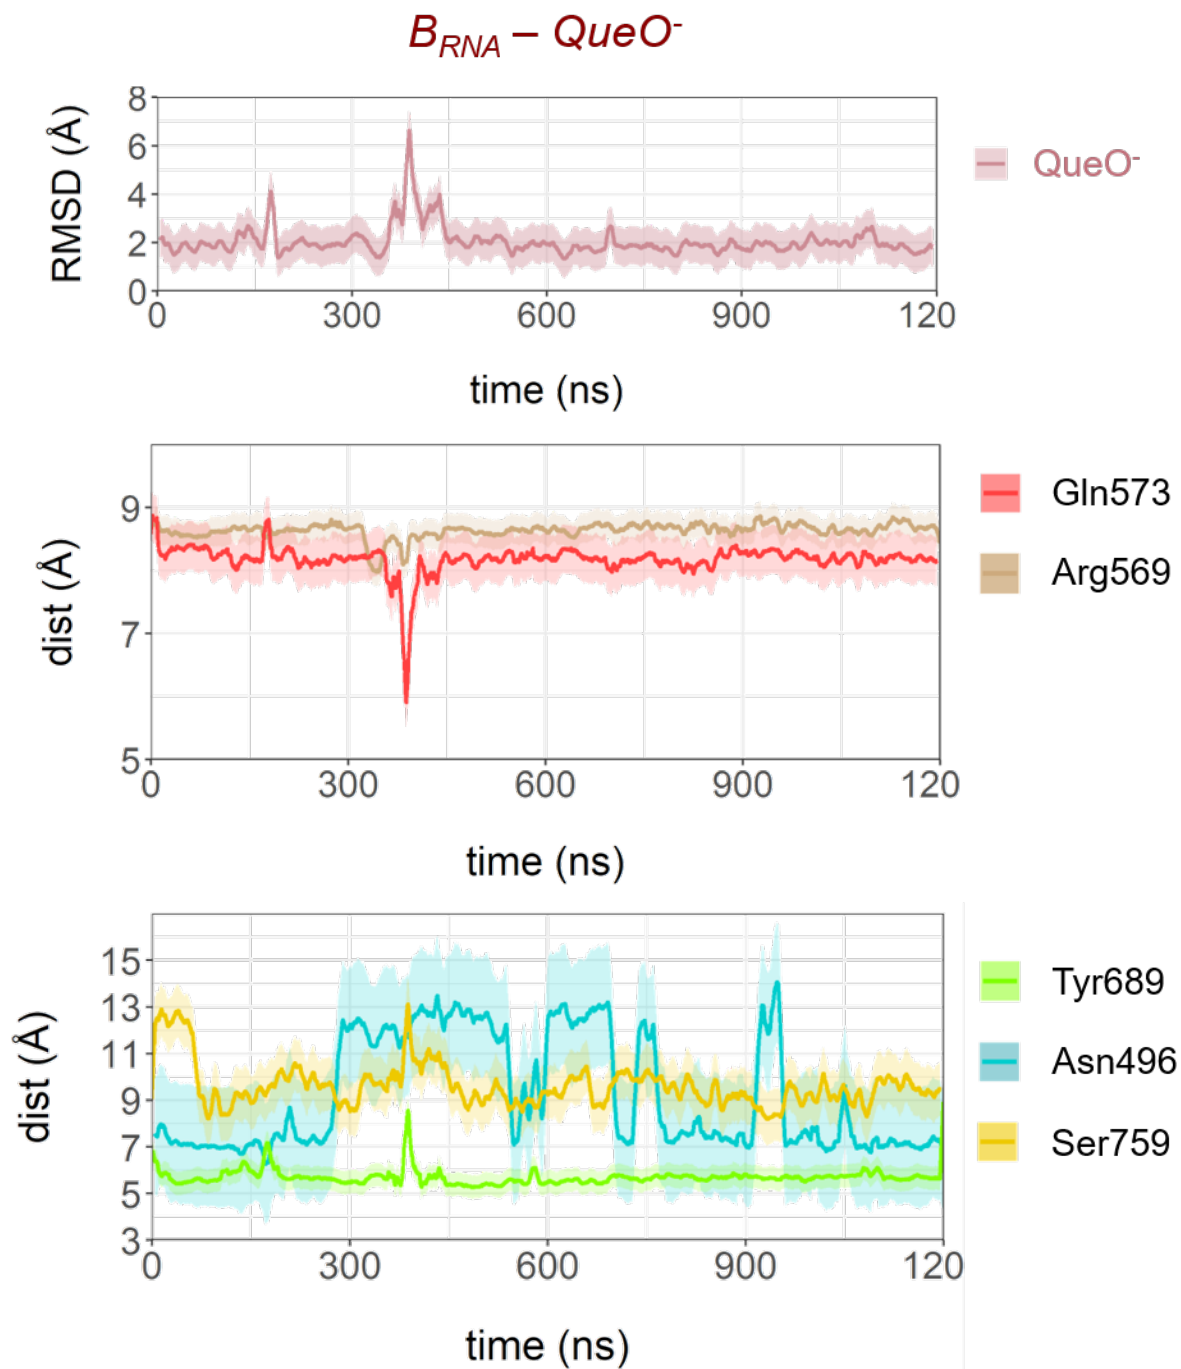

**Figure S5.** MD simulation of the  $B_{RNA}$ - $QueO^-$  system. (Top) Time evolution of the root mean square deviation (RMSD) for the heavy atoms of  $QueO^-$ . (Middle) Time evolution of the distances between the center of mass (C.O.M.) of the heavy atoms of the  $QueO^-$  ligand and i) the C.O.M. of the heavy atoms of the guanidinium group of Arg569 (in light brown), ii) the C.O.M. of the heavy atoms of the side chain of Gln573 (in pink). (Bottom) Time evolution of the distances between the center of mass (C.O.M.) of the heavy atoms of the  $QueO^-$  ligand and i) the C.O.M. of the heavy atoms of the side chain of Tyr689 (in green), ii) the C.O.M. of the heavy atoms of the side chain of Asn496 (in blue), and iii) the C.O.M. of the heavy atoms of the side chain of Ser759 (in yellow).
